# Supplementary material
Source: MDPI journal article supplement (https://www.mdpi.com/2075-163X/9/8/493)
Supplement: s1 [file s1]

## Supplementary data

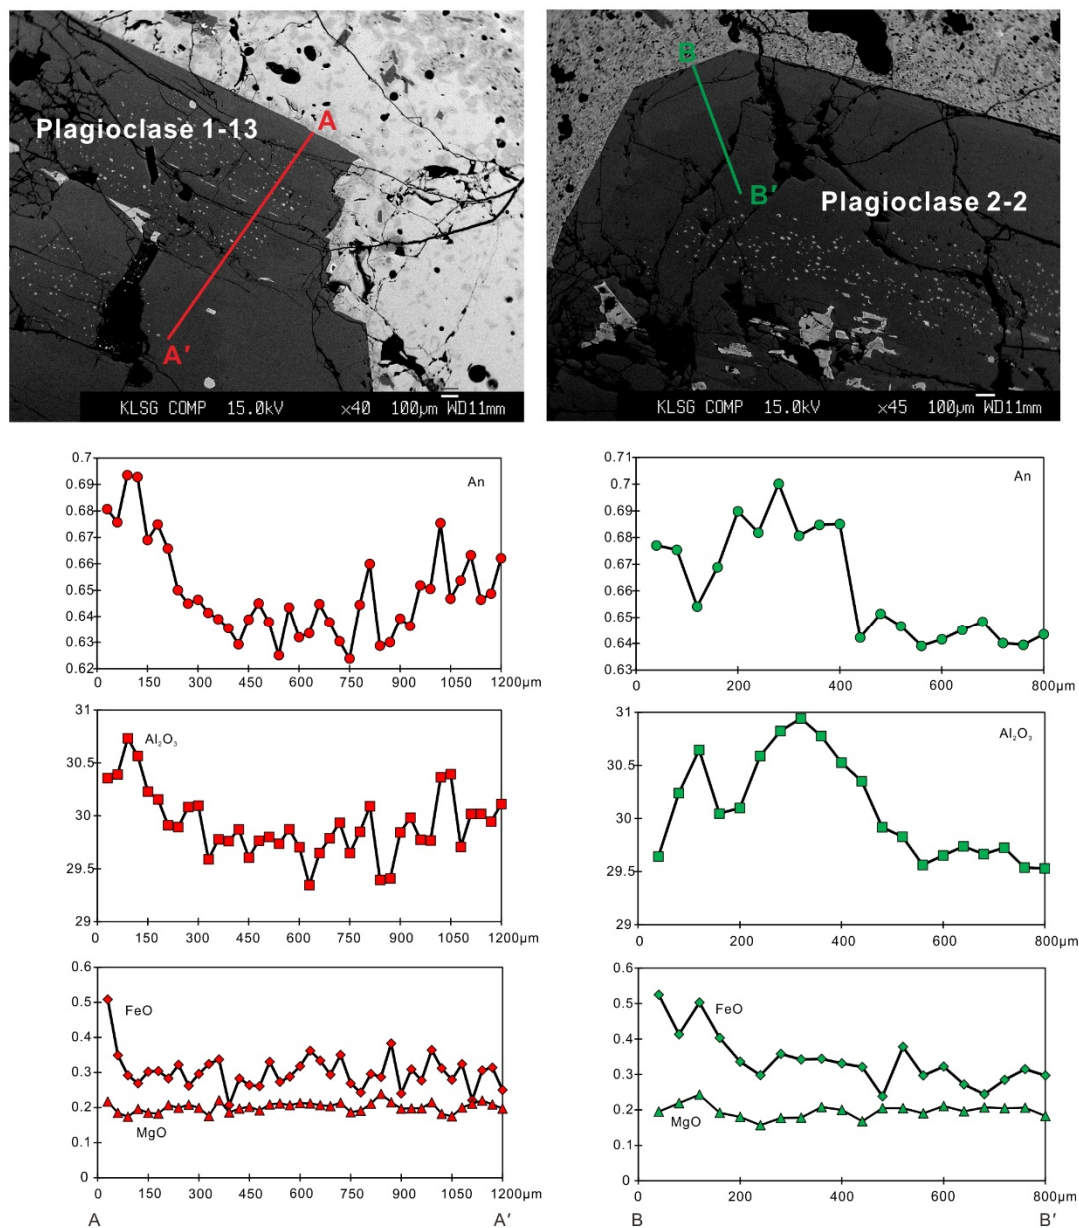

**Figure S1.** Backscatter electron images and chemical transects for two selected plagioclase macrocrysts (PL1-13 and PL2-2) in Mt. Jourdanne PUB. Lines (A-A' and B-B') mark the electron microprobe transects in plagioclases.
